# Supplementary material for: MitoStores: chaperone‐controlled protein granules store mitochondrial precursors in the cytosol
Source: PubMed Central journal article supplement (PMC10068336; doi:10.15252/embj.2022112309), 2023-01-27
Supplement: EMBJ-42-e112309-s014.pdf [file EMBJ-42-e112309-s014.pdf]

## Expanded View Figures

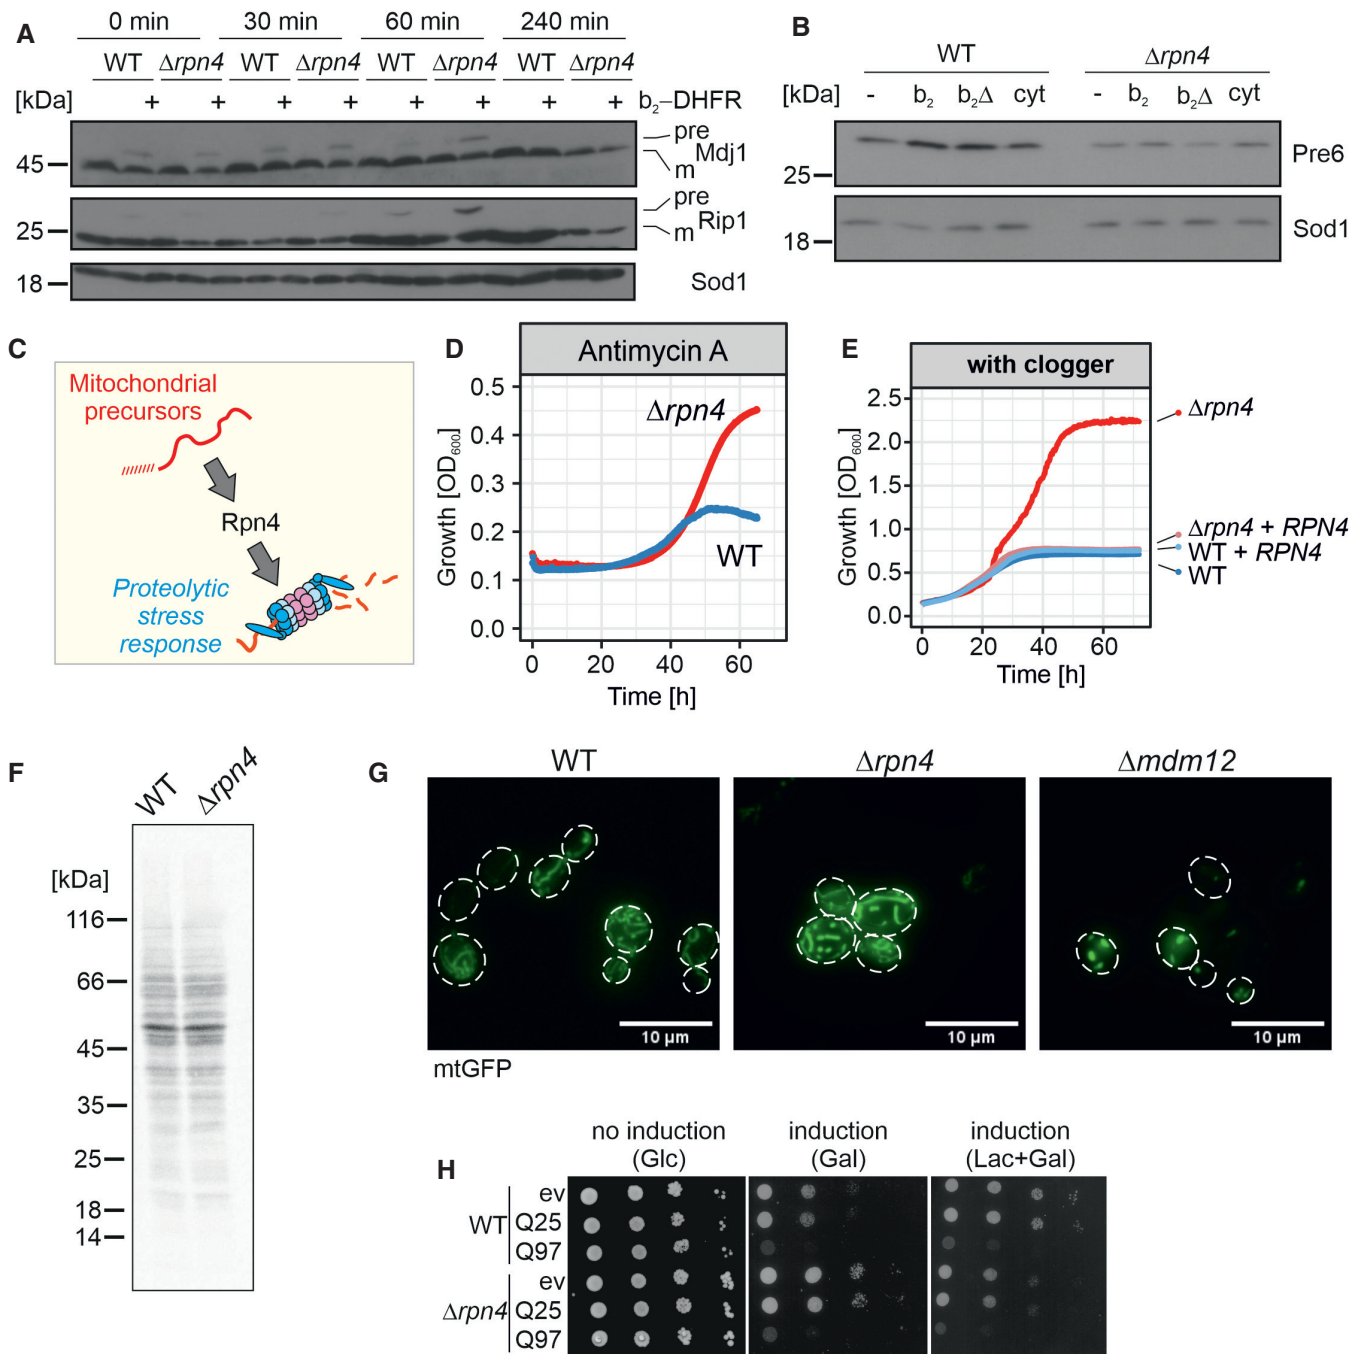

Figure EV1.

**Figure EV1. Rpn4-dependent proteasome induction.**

- A After 4.5 h of clogger expression in wild-type and  $\Delta rpn4$  cells, the medium was exchanged for a noninducing lactate medium. Precursor (pre) and mature (m) forms of the mitochondrial proteins Mdj1 and Rip1 were visualized by Western blotting. Sod1 was used as a loading control.
- B After 4.5 h expression of clogger and control, protein levels of the proteasome subunit Pre6 were visualized by Western Blotting. Please note, that in  $\Delta rpn4$  cells, clogger expression does not lead to Pre6 induction. Sod1 served as a loading control.
- C Schematic representation of Rpn4-dependent proteasome induction after mitoprotein-induced stress.
- D Cells of the indicated strains were grown to log phase and diluted in lactate medium to 0.1 OD<sub>600</sub>. After the addition of 100  $\mu$ g/ml antimycin A, growth was monitored upon constant agitation. Since antimycin A loses its activity over time, cells start growing once the membrane potential reaches a level that allows mitochondrial biogenesis.  $\Delta rpn4$  cells escaped the antimycin A-mediated growth inhibition more efficiently than wild-type cells.
- E Clogger-expressing wild-type and  $\Delta rpn4$  cells harboring empty or Rpn4-expression plasmids were grown over time in lactate plus 0.5% galactose medium.
- F Wild-type and  $\Delta rpn4$  cells were grown in lactate medium to log phase. 2  $\mu$ l of 22  $\mu$ Ci of <sup>35</sup>S-methionine was added to the cell suspension. After 5 min, cells were harvested, lysed, and subjected to SDS gel electrophoresis and autoradiography.
- G The indicated strains were transformed with plasmids expressing mitochondria-targeted GFP (mtGFP). The mitochondrial network was visualized by microscopy upon growth on galactose. Cells lacking Mdm12 were used as a control for a strain showing defective mitochondrial network formation (Dimmer et al, 2002). Scale bars, 10  $\mu$ m.
- H Yeast cells expressing a fusion protein of the N-terminal region of human huntingtin with different lengths of glutamine residues (Q25-GFP and Q97-GFP, respectively; Schlagowski et al, 2021) and GFP under control of the galactose-inducible promoter, or a control for comparison were grown to mid-log phase on noninducing glucose medium. Ten-fold serial dilutions were dropped on glucose (no induction), galactose (induction), or lactate with 0.5% galactose medium (induction).

Source data are available online for this figure.

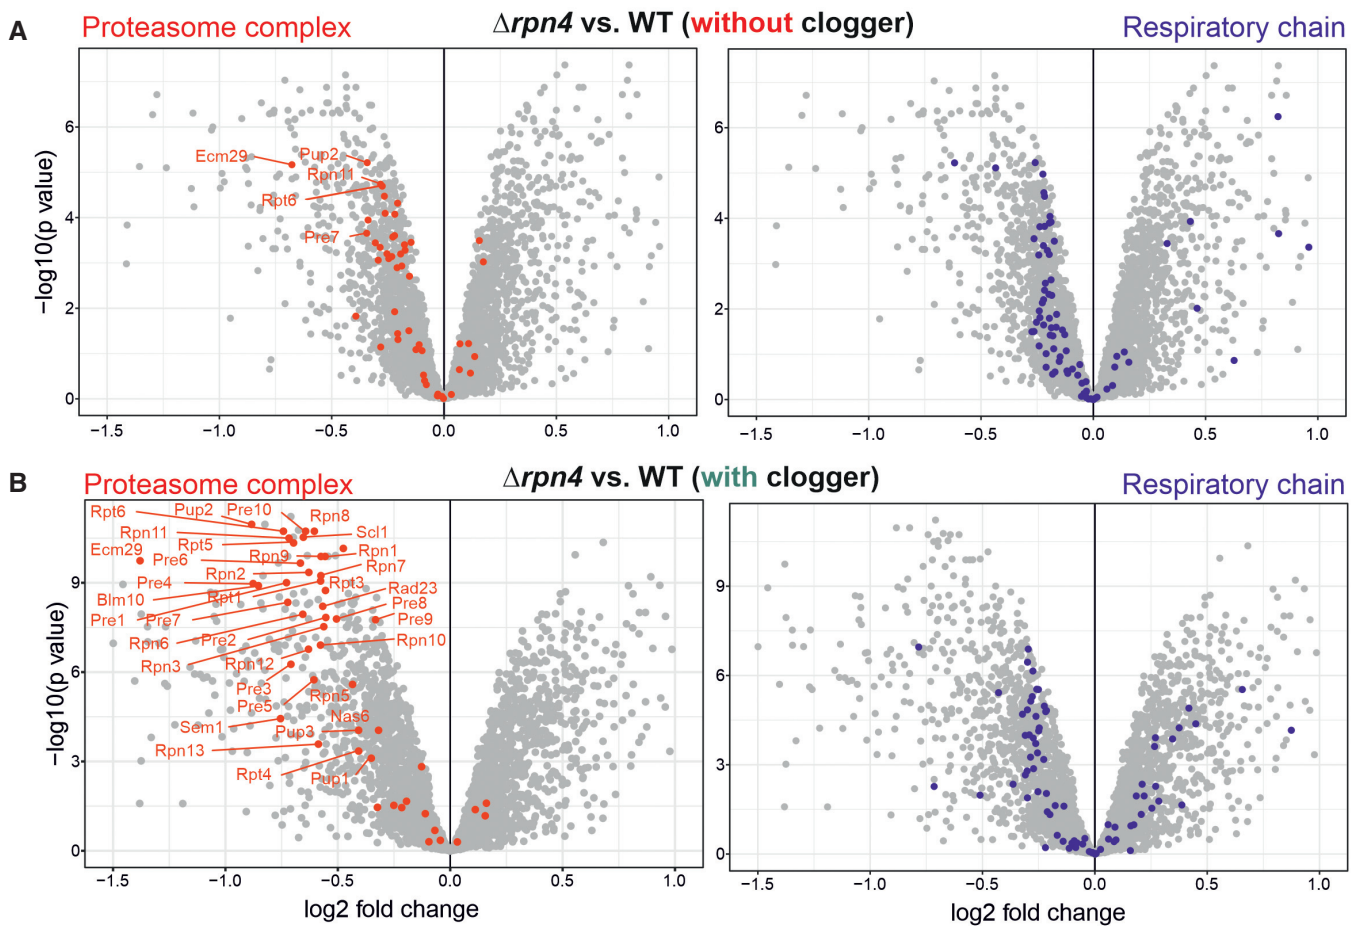

Figure EV2.

**Figure EV2. Rpn4 deletion leads to a reduction in proteasomal and respiratory proteins.**

A, B Comparison of the proteome of wild-type and  $\Delta rpn4$  cells before and after clogger expression for 6 h. Positions of proteins of the proteasome and the respiratory chain systems are indicated in red and purple, respectively (Morgenstern et al, 2017; Boos et al, 2019). Please note especially the proteasomal proteins show a lower abundance in  $\Delta rpn4$  cells.

**Figure EV3. Protein aggregation in the yeast cytosol can be efficiently measured by visualization of the distribution of Hsp104-GFP.**

- A Yeast cells expressing the temperature-sensitive, aggregation-prone proteins luciferase<sup>ts</sup>-RFP (Luc<sup>ts</sup>-RFP) and Ubc9<sup>ts</sup>-RFP under galactose-inducible promoters together with constitutively expressed Hsp104-GFP or Hsp104<sup>Y662A</sup>-GFP were grown to mid-log phase on lactate medium. Ten-fold serial dilutions were dropped on lactate (no induction) or galactose medium (induction) and incubated at 25°C or 37°C as indicated.
- B Cells of the indicated strains were grown to log phase and diluted in lactate (no induction) or galactose (induction) to 0.1 OD. Growth was monitored upon constant agitation at 28°C and 37°C, respectively.
- C After 2 h of Luc<sup>ts</sup>-RFP or Ubc9<sup>ts</sup>-RFP expression together with constitutive Hsp104-GFP expression at 37°C (induction), cells were incubated for 4 h in the absence of galactose at 30°C (rescue). Scale bars, 2  $\mu$ m.
- D Fluorescence intensity profiles of cells marked with an asterisk in (C). The measured area is indicated with a white line.
- E After 4 h growth on lactate medium (no induction) or galactose medium (induction), the protein level of the proteasomal protein Pre6 was visualized by Western Blotting. Djp1 was used as a loading control.
- F Schematic representation of the interaction of aggregation-prone proteins with Hsp104.

Source data are available online for this figure.

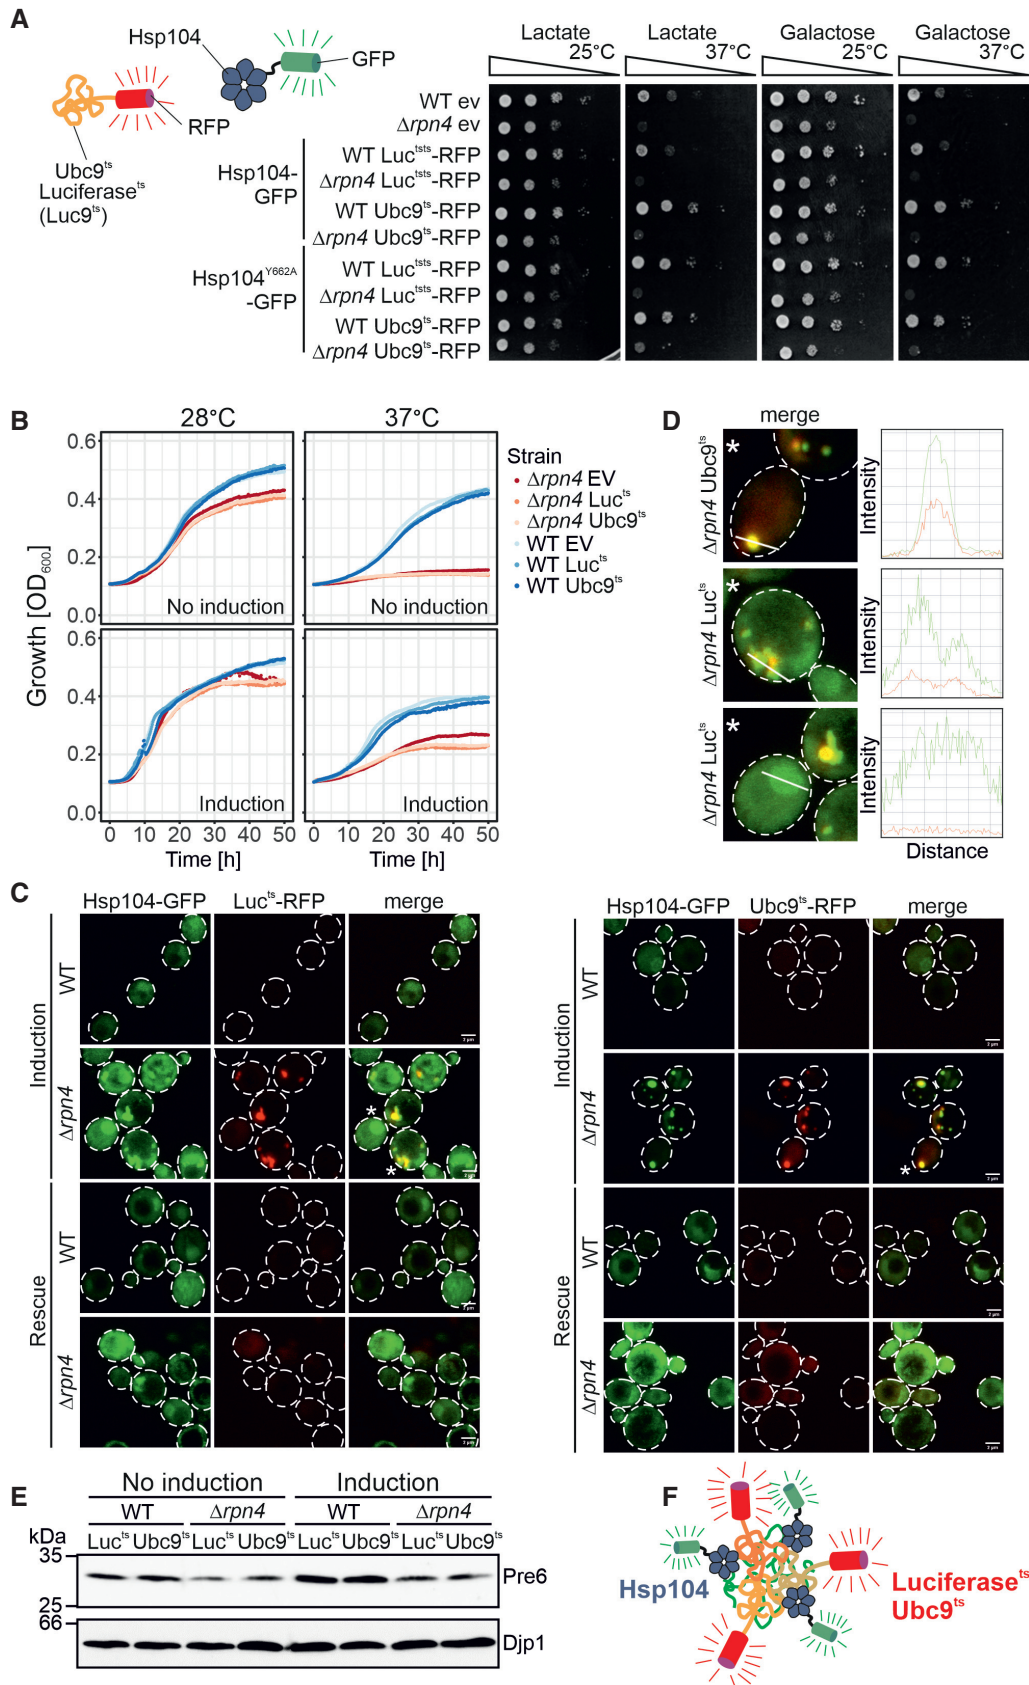

Figure EV3.

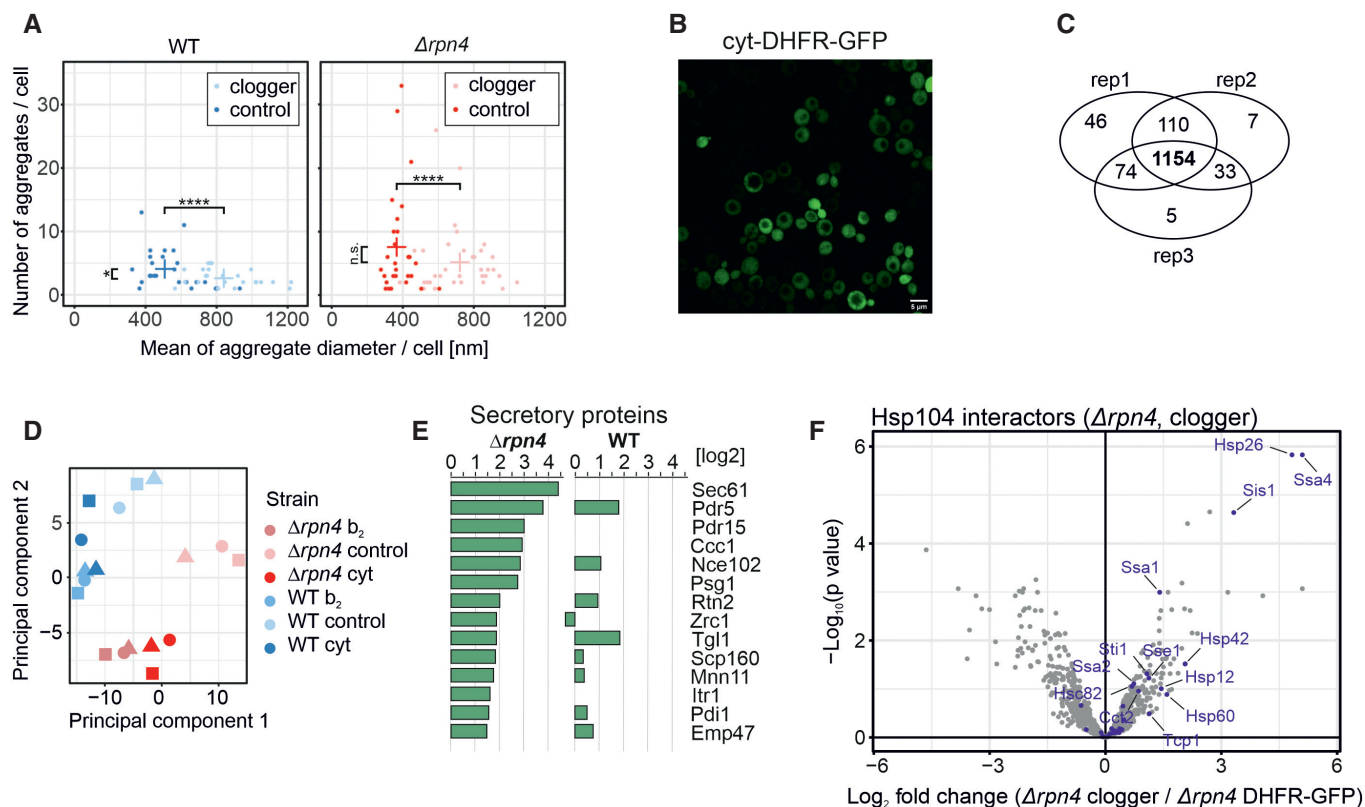

**Figure EV4. Deletion of Rpn4 remodels the cytosolic chaperone network.**

- A Quantification of aggregate formation in WT and  $\Delta rpn4$  cells expressing either the clogger or a cytosolic DHFR as a control for 4.5 h. Plotted are the mean diameters of the individual aggregates in nm, as well as the number of aggregates per cell. Data are displayed as mean  $\pm$  standard deviations from  $n = 36$  independent biological replicates. Significance was assessed using a two-sided, paired Student's  $t$ -test.  $P$ -values are indicated as asterisks. asterisks  $**P \leq 0.01$ ,  $****P \leq 0.0001$ .
- B After expressing the cytosolic DHFR-GFP construct for 4.5 h in WT cells, the expression was visualized by confocal microscopy. Scale bars, 10  $\mu\text{m}$ .
- C Identification overview of the mass spectrometry. 1,154 proteins were measured in all samples of the three replicates.
- D Principal component analysis. Rpn4 deletion and clogger expression caused specific changes in the proteome. The different shapes of the individual data points indicate the three biological replicates.
- E Purified proteins of the secretory pathway interacting with Hsp104-GFP in  $\Delta rpn4$  expressing the clogger normalized to the control.
- F Hsp104 interactors in the presence of clogger relative to interactors of DHFR-GFP. Chaperones are shown in purple.

Source data are available online for this figure.

**Figure EV5. MitoStore formation depends on the Hsp42/Hsp104 chaperone system.**

- A Microscopy of  $\Delta rnr1$  and  $\Delta rpn4\Delta rnr1$  cells expressing Hsp104-GFP constitutively and the clogger or cytosolic control for 4.5 h. Please note that the formation of MitoStores did not depend on the yeast prion protein Rnq1. Scale bars, 2  $\mu\text{m}$ .
- B Quantification of the colocalization of Hsp104-GFP with Pdb1-RFP after clogger expression for 4.5 h.
- C After 4.5 h of clogger and Aim17-RFP expression, WT and  $\Delta rpn4$  cells were incubated for 4 h in the absence of galactose. Whereas Hsp104-GFP was distributed throughout the cytosol after this chase period, Aim17-RFP showed a distribution pattern characteristic of mitochondrial proteins.
- D Quantification of the colocalization of mito-GFP with Pdb1-RFP after clogger expression for 4.5 h in the  $\Delta rpn4$  mutant.
- E Cells expressing mitochondria-targeted GFP (mtGFP) were grown in lactate medium containing 0.5% galactose for 4.5 h and visualized. Whereas  $\Delta rpn4$  cell mtGFP shows a typical mitochondrial staining even upon clogger expression, the fluorescence in the clogger-expressing wild-type cells is more patchy and less defined. Scale bars, 5  $\mu\text{m}$ .
- F Expression of a heat shock response reporter that uses a YFP cassette expressed under the control of a heat shock element in the different strains indicated (Zheng et al, 2016; Boos et al, 2019). Cells were grown in lactate containing medium. Note that induction to 37°C activated the heat shock promoter, but the deletion of Hsp42, Hsp104, or Rpn4 under the nonchallenged conditions of the experiment did not. Data are displayed as mean  $\pm$  standard deviations from  $n = 3$  independent biological replicates.
- G Cells of the indicated strains were grown to log phase and diluted in glucose or galactose medium to 0.1 OD<sub>600</sub>. Growth was monitored upon constant agitation at 37°C, respectively.
- H Cells were grown in lactate to mid-log phase before 50°C heat stress was performed for the indicated time points. After each time aliquots were removed, and the number of living cells was assessed by a plating assay.

Source data are available online for this figure.

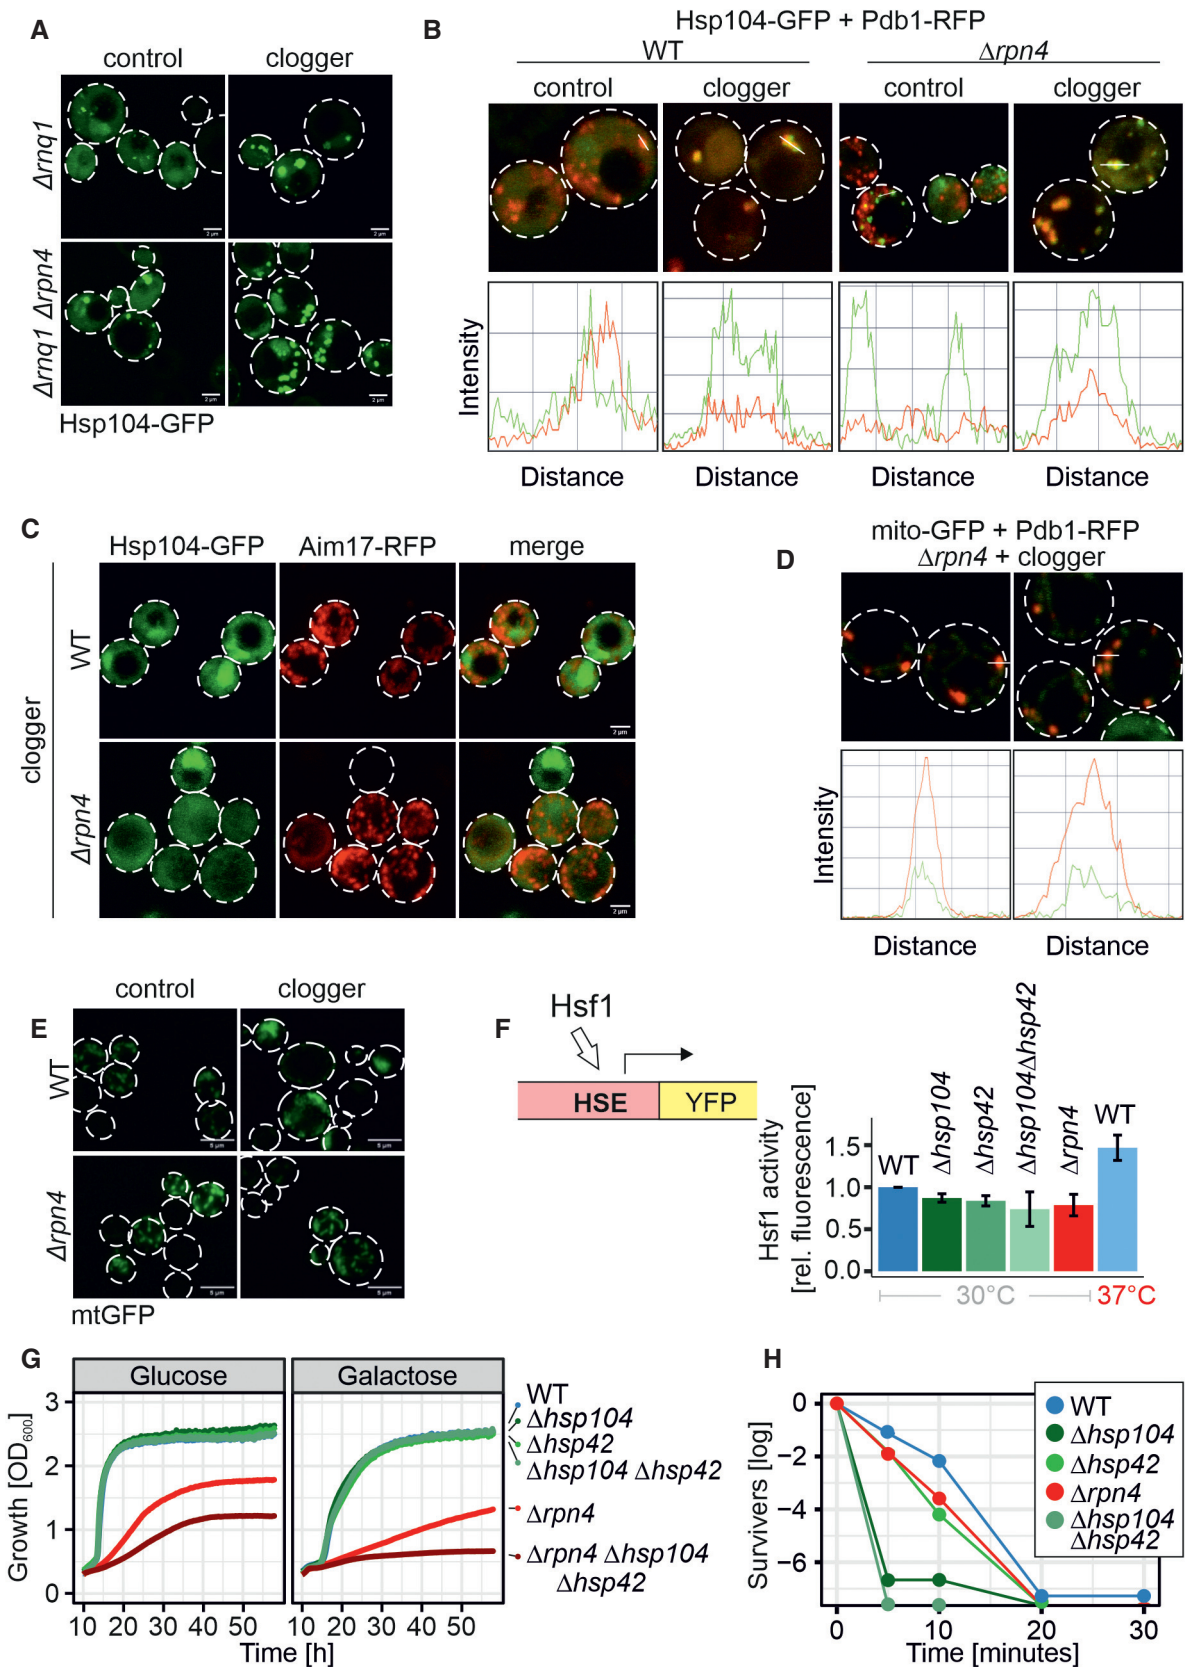

Figure EV5.
